# Supplementary material
Source: JCI journal article supplement (doi:10.1172/jci204535)
Supplement: sd1 [file 1]

## Supplementary Data

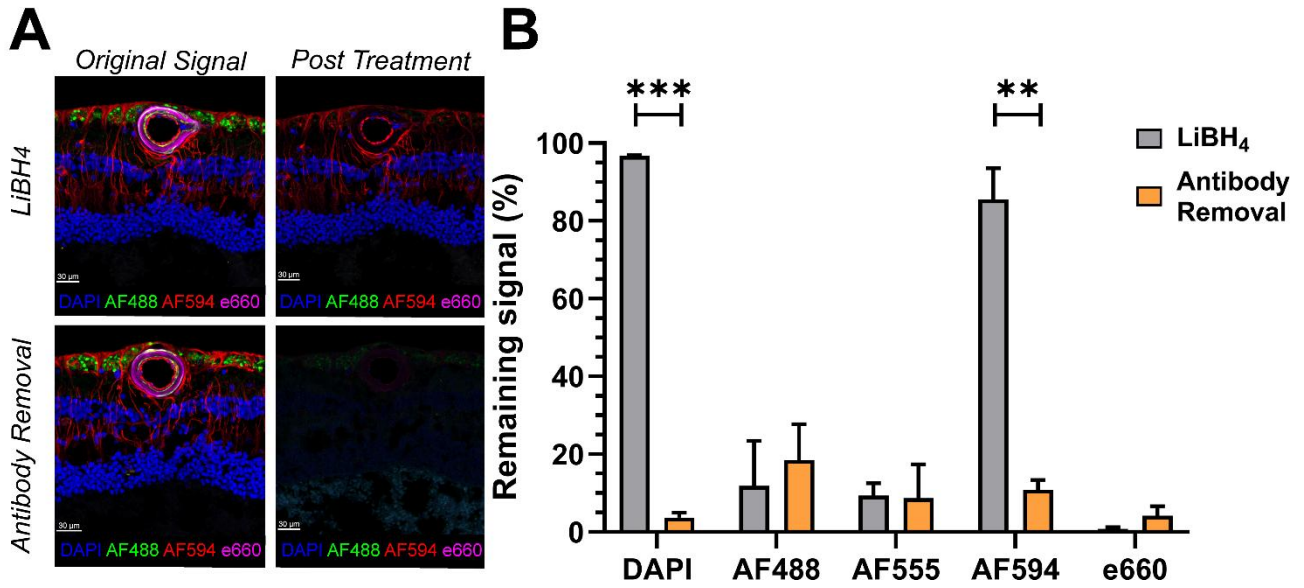

**Figure S1: Antibody removal reagent significantly diminishes fluorescence signal from DAPI and AF594 which is resistant to LiBH<sub>4</sub> bleaching. (A)** DAPI or AF594 is not bleached by LiBH<sub>4</sub> treatment. Antibody removal reagent attenuates their fluorescence. Scale Bars: 30 μm **(B)** Percentage of fluorophore signal remaining after 20 minutes of LiBH<sub>4</sub> or antibody removal reagent treatment. Mean ± SEM, n=3 different human retinas. DAPI and AF594 signal is significantly attenuated by antibody removal compared to LiBH<sub>4</sub> (T-test: \*\*p<0.01, \*\*\*p<0.001)

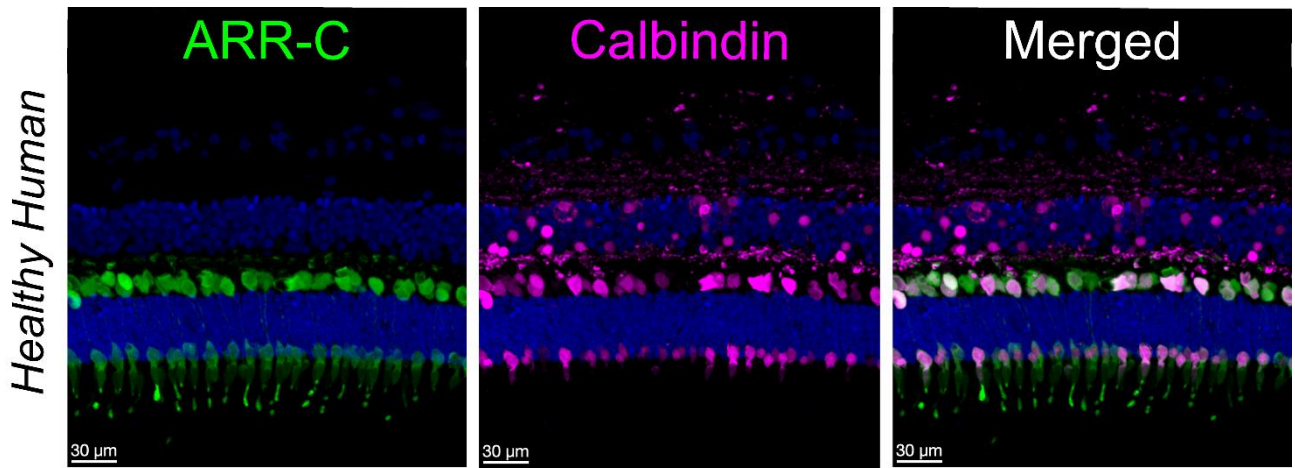

**Figure S2:** Composite image generated using IBEX demonstrates ARR-C labelling to illustrate cones and calbindin within the inner segment region of a healthy human central retina. Calbindin expression is observed within the inner segments of ARR-C+ cones.

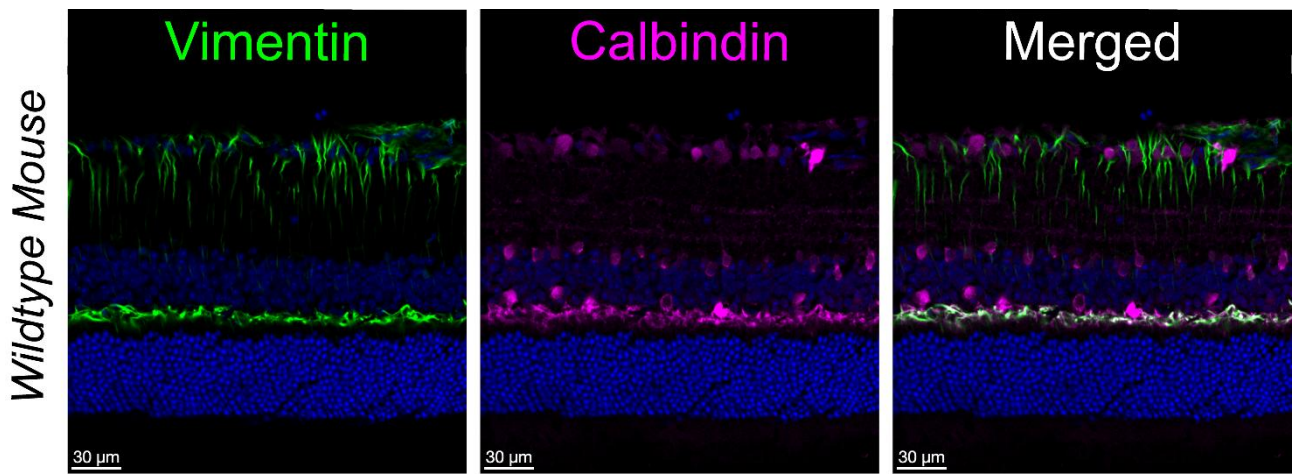

**Figure S3:** Composite image generated using IBEX shows Vimentin and Calbindin labelling in a wildtype mouse retina. Vimentin expression in mouse retina at the OPL region colocalises with calbindin.

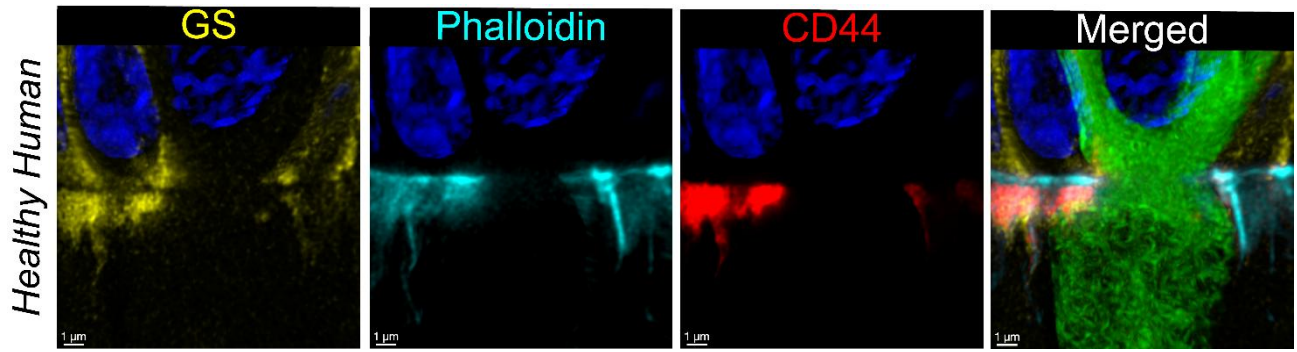

**Figure S4:** Super-resolution imaging of the GS-Phalloidin-CD44 complex in the human retina. A linear gap can be observed at the endfeet of Müller Glia colocalising with the F-actin-rich adherens belt (Phalloidin)

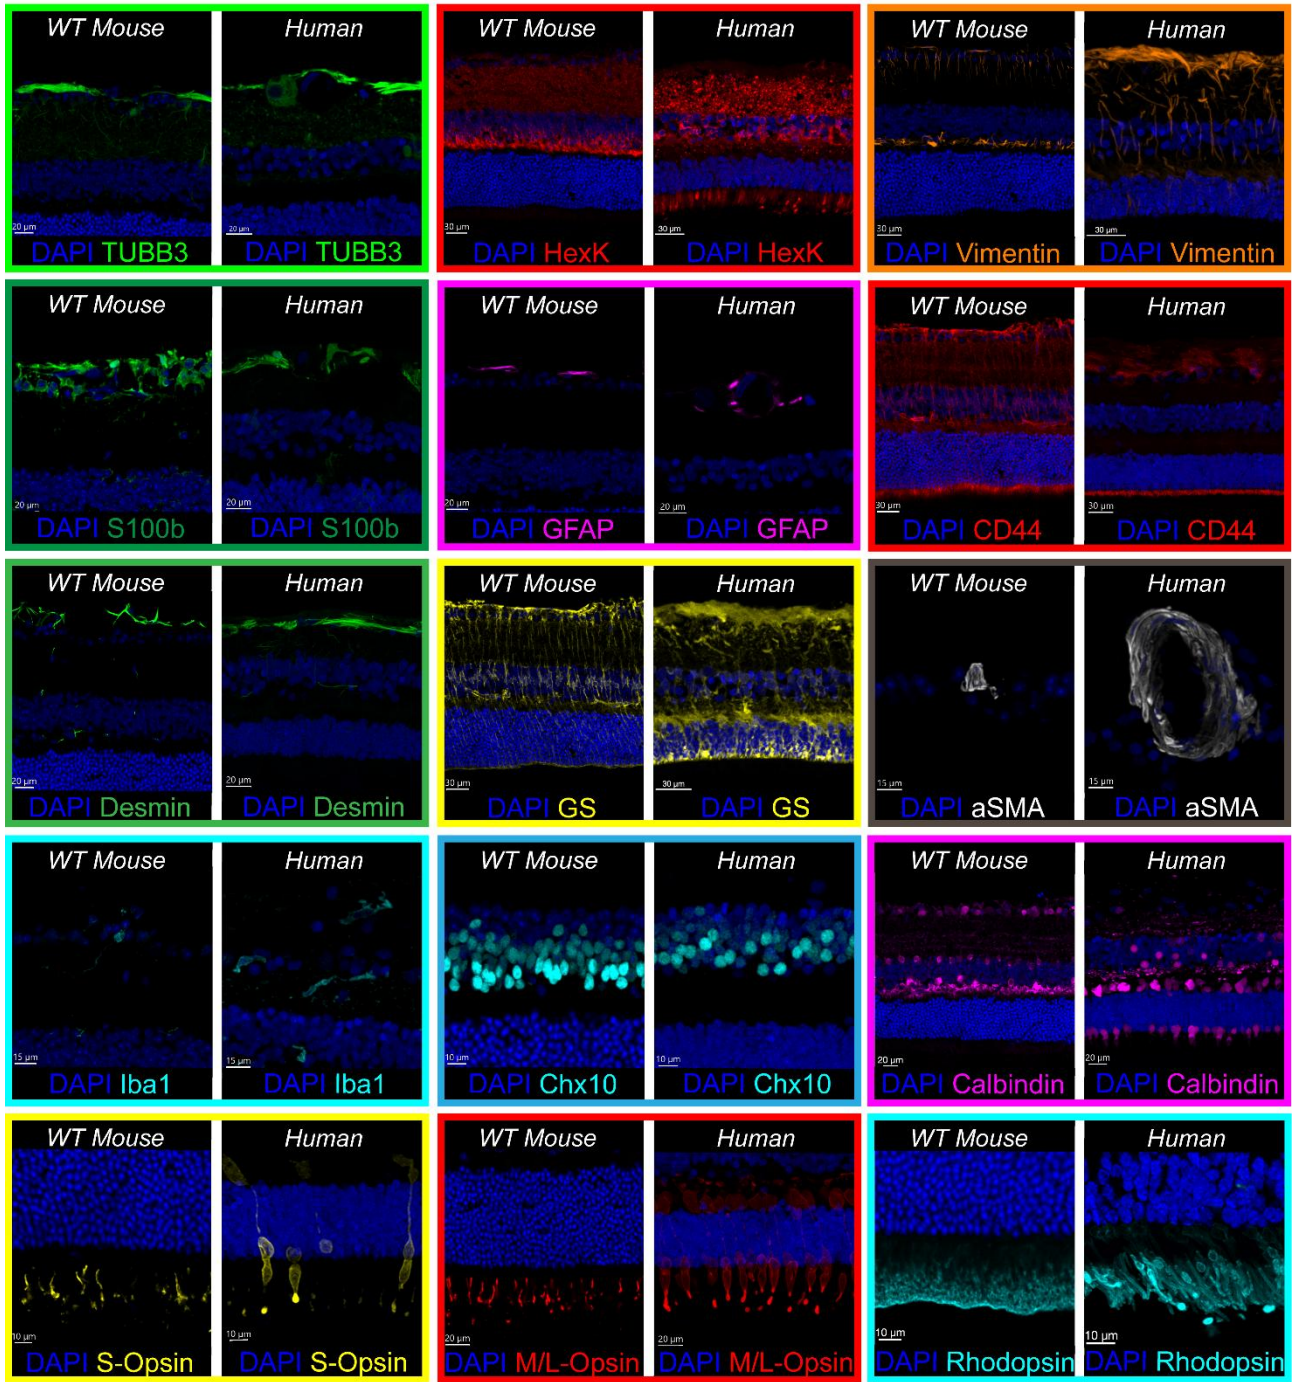

**Figure S5:** Cross-reactive protein marker comparisons in wildtype mouse and healthy human retinas. All images of the fifteen cross-reactive markers were generated using IBEX.

**Table S1** Primary antibodies and lectins used in immunohistochemistry for fixed-frozen human retina

| Marker            | Clone   | Conjugate | Isotype               | Vendor       | Cat. Number | Dilution | RRID        |
|-------------------|---------|-----------|-----------------------|--------------|-------------|----------|-------------|
| DAPI              | -       | UV        | N/A                   | Merck-Sigma  | D9542-1MG   | 1:1000   | -           |
| GS                | GS-6    | AF532     | Mouse IgG2a, $\kappa$ | Merck-Sigma  | MAB302      | 1:100    | AB 2110656  |
| Iba1              | -       | Purified  | Goat IgG              | Abcam        | Ab5076      | 1:200    | AB 2224402  |
| $\alpha$ SMA      | IA4     | AF532     | Mouse IgG2a, $\kappa$ | ThermoFisher | 14-9760-82  | 1:100    | AB 2572996  |
| Desmin            | Y66     | AF488     | Rabbit IgG            | Abcam        | Ab185033    | 1:200    | AB 2892748  |
| Calbindin         | -       | AF532     | Rabbit Polyclonal     | Merck-Sigma  | ABN2192     | 1:50     | AB 2935805  |
| PKCa              | H-7     | AF680     | Mouse IgG1, $\kappa$  | Santa-Cruz   | SC-8393     | 1:100    | AB 628142   |
| ChAT              | -       | Purified  | Goat Polyclonal       | Merck-Sigma  | AB144P      | 1:100    | AB 2079751  |
| $\beta$ 3-Tubulin | TUJ1    | AF488     | Mouse IgG2a, $\kappa$ | Biologend    | 801203      | 1:200    | AB 2564757  |
| Chx10             | E-12    | AF546     | Mouse IgG2a, $\kappa$ | Santa-Cruz   | SC-365519   | 1:100    | AB 10842442 |
| GFAP              | SMI25   | AF488     | Mouse IgG2b, $\kappa$ | Biologend    | 837508      | 1:200    | AB 2734610  |
| Vimentin          | O91D3   | AF555     | Mouse IgG2a, $\kappa$ | Biologend    | 677802      | 1:200    | AB 2565982  |
| CD44              | IM7     | i594      | Rat IgG2b, $\kappa$   | AAT Bioquest | 356128      | 1:100    | AB 2935685  |
| HSP60             | -       | Purified  | Rabbit Polyclonal     | Abcam        | ab46798     | 1:200    | AB 881444   |
| Arrestin C        | 7G6     | AF488     | Mouse IgG1, $\kappa$  | Merck-Sigma  | MABN2636    | 1:200    | AB 2935804  |
| S-Opsin           | -       | AF532     | Rabbit Polyclonal     | Merck-Sigma  | AB5407      | 1:100    | AB 177457   |
| STING             | E9X7F   | AF647     | Rabbit IgG            | CST          | 90173       | 1:100    | AB 3675228  |
| S100 $\beta$      | EP1576Y | AF488     | Rabbit IgG            | Abcam        | Ab196442    | 1:200    | AB 2722596  |
| YH2AX             | -       | AF546     | Rabbit Polyclonal     | ProteinTech  | 10856-1-AP  | 1:200    | AB 2114985  |
| M/L-Opsin         | -       | i594      | Rabbit Polyclonal     | Merck-Sigma  | Ab5405      | 1:200    | AB 177456   |
| COL IV            | 1042    | e660      | Mouse IgG2b, $\kappa$ | ThermoFisher | 50-9871-82  | 1:200    | AB 2574404  |
| PNA               | -       | AF488     | N/A                   | ThermoFisher | L32458      | 1:200    | -           |
| Rhodopsin         | 1D4     | AF546     | Mouse IgG1, $\kappa$  | Santa-Cruz   | SC-57432    | 1:200    | AB 785511   |

**Table S2** Primary antibodies and lectins used in immunohistochemistry for fixed-frozen mouse retina

| Marker            | Clone       | Conjugate | Isotype               | Vendor       | Cat. Number | Dilution | RRID        |
|-------------------|-------------|-----------|-----------------------|--------------|-------------|----------|-------------|
| DAPI              | -           | UV        | N/A                   | Merck-Sigma  | D9542-1MG   | 1:1000   | -           |
| Desmin            | Y66         | AF488     | Rabbit IgG            | Abcam        | Ab185033    | 1:200    | AB 2892748  |
| S-Opsin           | -           | AF532     | Rabbit Polyclonal     | Merck-Sigma  | AB5407      | 1:100    | AB 177457   |
| Chx10             | E-12        | AF546     | Mouse IgG2a, $\kappa$ | Santa-Cruz   | SC-365519   | 1:100    | AB 10842442 |
| Hexokinase        | C35C4       | i594      | Rabbit IgG            | CST          | 2024S       | 1:100    | AB 2116996  |
| STING             | E9X7F       | AF647     | Rabbit IgG            | CST          | 90173       | 1:100    | AB 3675228  |
| CD45              | 30-F11      | AF700     | Rat IgG2b, $\kappa$   | Biolegend    | 103128      | 1:100    | AB 493715   |
| S100 $\beta$      | EP1576Y     | AF488     | Rabbit IgG            | Abcam        | Ab196442    | 1:200    | AB 2722596  |
| Calbindin         | -           | AF532     | Rabbit Polyclonal     | Merck-Sigma  | ABN2192     | 1:100    | AB 2935805  |
| HSP60             | -           | Purified  | Rabbit Polyclonal     | Abcam        | ab46798     | 1:200    | AB 881444   |
| M/L-Opsin         | -           | i594      | Rabbit Polyclonal     | Merck-Sigma  | Ab5405      | 1:200    | AB 177456   |
| GFAP              | SMI25       | AF647     | Mouse IgG2b, $\kappa$ | Biolegend    | 837511      | 1:200    | AB 2734610  |
| PKCa              | H-7         | AF680     | Mouse IgG1, $\kappa$  | Santa-Cruz   | SC-8393     | 1:100    | AB 628142   |
| GS                | GS-6        | AF532     | Mouse IgG2a, $\kappa$ | Merck-Sigma  | MAB302      | 1:100    | AB 2110656  |
| Iba1              | -           | Purified  | Goat IgG              | Abcam        | Ab5076      | 1:200    | AB 2224402  |
| CD44              | IM7         | i594      | Rat IgG2b, $\kappa$   | AAT Bioquest | 356128      | 1:100    | AB 2935685  |
| $\beta$ 3-Tubulin | TUJ1        | AF488     | Mouse IgG2a, $\kappa$ | Biolegend    | 801203      | 1:200    | AB 2564757  |
| P53               | 7F5         | Purified  | Rabbit IgG            | CST          | 2527S       | 1:100    | AB 10695803 |
| PNA               | -           | AF488     | N/A                   | ThermoFisher | L32458      | 1:200    | -           |
| $\alpha$ SMA      | IA4         | AF532     | Mouse IgG2a, $\kappa$ | ThermoFisher | 14-9760-82  | 1:100    | AB 2572996  |
| p16               | F-12        | AF546     | Mouse IgG2a, $\kappa$ | Santa-Cruz   | SC-1661     | 1:200    | AB 628067   |
| Isolectin B4      | -           | AF594     | N/A                   | ThermoFisher | I21413      | 1:200    | -           |
| Calretinin        | DAK-Calret1 | AF647     | Mouse IgG1, $\kappa$  | Dako Agilent | M724529-2   | 1:200    | AB 2068519  |
| COL IV            | -           | Purified  | Rabbit Polyclonal     | Abcam        | ab19808     | 1:100    | AB 445160   |
| Rhodopsin         | 1D4         | AF546     | Mouse IgG1, $\kappa$  | Santa-Cruz   | SC-57432    | 1:200    | AB 785511   |
| Vimentin          | W16220A     | AF647     | Rat IgG2a, $\kappa$   | Biolegend    | 699308      | 1:200    | AB 2888890  |

**Table S3** Secondary Antibodies used for immunohistochemistry

| <b>Marker</b>   | <b>Clone</b> | <b>Conjugate</b> | <b>Isotype</b> | <b>Vendor</b> | <b>Cat. Number</b> | <b>Dilution</b> | <b>RRID</b> |
|-----------------|--------------|------------------|----------------|---------------|--------------------|-----------------|-------------|
| anti-Rabbit IgG | -            | AF488            | Donkey IgG     | ThermoFisher  | A21206             | 1:1000          | AB 2535792  |
| anti-Rabbit IgG | -            | AF594            | Donkey IgG     | ThermoFisher  | A32754             | 1:1000          | AB 2762827  |
| anti-Rabbit IgG | -            | AF680            | Donkey IgG     | ThermoFisher  | A32802             | 1:1000          | AB 2762836  |
| anti-Rat IgG    | -            | AF594            | Donkey IgG     | ThermoFisher  | A21209             | 1:1000          | AB 2535795  |
| anti-Goat IgG   | -            | AF555            | Donkey IgG     | ThermoFisher  | A32816             | 1:1000          | AB 2762839  |
